# Supplementary material for: RpoS role in virulence and fitness in enteropathogenic Escherichia coli
Source: PubMed Central journal article supplement (PMC5491219; doi:10.1371/journal.pone.0180381), 2017-06-29
Supplement: pone.0180381.s001.pdf [file pone.0180381.s001.pdf]

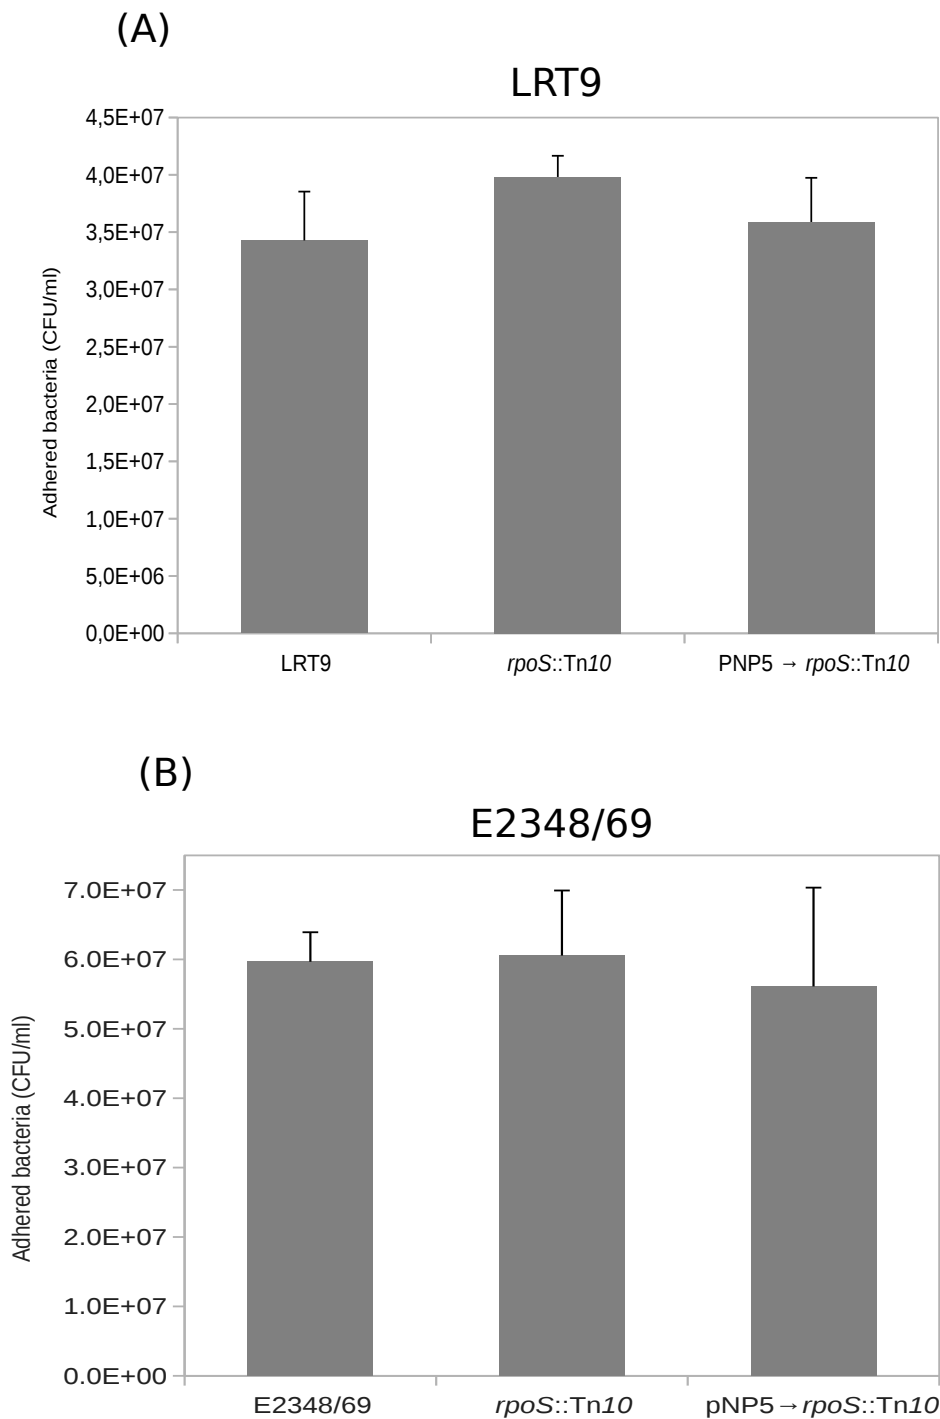

**Figure S1** Effect of *rpoS* on the adherence of EPEC to epithelial cells.  $5 \times 10^7$  bacteria were transferred to HEp-2 cells monolayers in DMEM supplemented with 2% FBS and incubated for 3 h. The cell wells were washed and the bacteria were released, diluted and plated on L-agar for CFU counting. (A) LRT9, wild-type strain; *rpoS::Tn10*, LRT9 carrying a *rpoS* mutation; pNP5->*rpoS::Tn10*, *prpoS*<sup>+</sup> plasmid in strain LRT9 *rpoS::Tn10*. (B) E2348/69, wild-type strain; E2348/69 *rpoS::Tn10*; pNP5->E2348/69 *rpoS::Tn10*. Each bar represents the mean  $\pm$  S.E.M. of three independent experiments.
