# Supplementary material for: RpoS role in virulence and fitness in enteropathogenic Escherichia coli
Source: PubMed Central journal article supplement (PMC5491219; doi:10.1371/journal.pone.0180381), 2017-06-29
Supplement: pone.0180381.s003.pdf [file pone.0180381.s003.pdf]

(A)

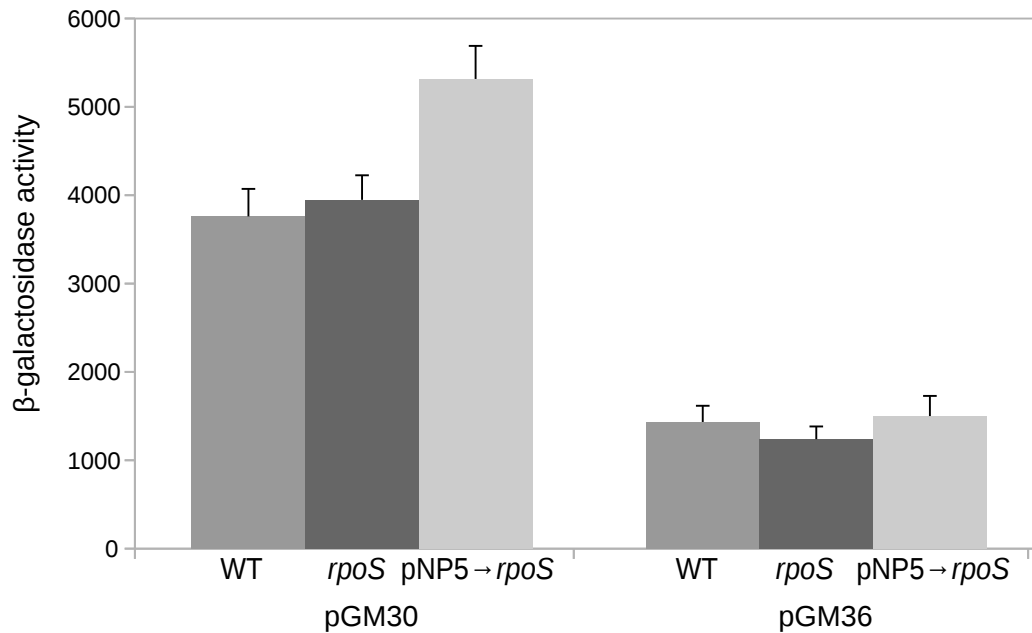

(B)

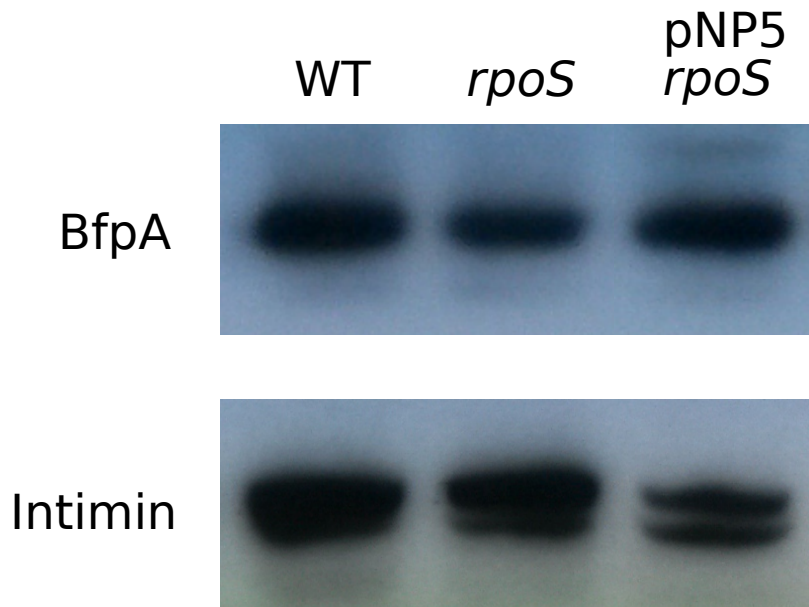

**Figure S3** Effect of *rpoS* on the expression of *bfpA* and *eae* in strain LRT9.

Bacteria were grown in DME medium and incubated at 37°C without shaking for 6 hours, at which time samples were withdrawn and assayed for (A)  $\beta$ -galactosidase. pGM30, operon fusion between *bfpA* promoter and *lacZ*; pGM36, *tir-eae* promoter fused to *lacZ*. WT, strain LRT9; *rpoS*, LRT9 *rpoS*::Tn10 and pNP5→*rpoS*, LRT9 *rpoS*::Tn10 carrying plasmid pNP5. (B) Bacteria grown as described above were harvested and immunoblotted with anti-SPA (FLAG 3X) antibodies. WT, *rpoS* and pNP5 *rpoS* correspond to LRT9 and its derivatives carrying chromosomal copies of *bfpA*::SPA or *eae*::SPA.
